# Supplementary material for: Reactive Jumps Preserve Skeletal Muscle Structure, Phenotype, and Myofiber Oxidative Capacity in Bed Rest
Source: Front Physiol. 2020 Jan 15;10:1527. doi: 10.3389/fphys.2019.01527 (PMC6974579; doi:10.3389/fphys.2019.01527)
Supplement: TABLE S2 — Raw data VL capillarization. Non-parametric Friedman test with post hoc Dunn–Bonferroni testing was performed, pairwise comparison by Wilcoxon/Mann–Whitney U-test in cases of missing values. P-value fiber type – comparison between different myofiber types within a group, p-value group – comparison between groups at the same timepoint, p-value time – comparison within one group between different time points. [file Table_2.xlsx]

## Sheet: supp. table 2 capillarziation
	JUMP										CTRL
	pre		N	post		N	recovery		N	p-value within group	pre		N	post		N	recovery		N	p-value within group	p-value between group
CDmm2	mean	sd		mean	sd		mean	sd			mean	sd		mean	sd		mean	sd			pre	post	recovery
all myofibers	300.192	66.9597	6	283.625	37.8261	6	269.158	64.8305	6	1	294.608	79.9399	6	280.733	51.5035	6	271.442	64.1744	6	0.846	1	0.937	0.937
CF ratio
all myofibers	1.51833	0.356352	6	1.57917	0.44819	6	1.4975	0.272924	6	0.607	2.0725	0.517907	6	1.7	0.620669	6	1.6175	0.484507	6	0.115	0.065	0.937	0.699
DAF											mean	sd		mean	sd		mean	sd			pre	post	recovery
fast	5.055	0.443385	6	5.1475	0.857716	6	4.9075	0.463516	6	0.513	6.33	1.21	6	5.31	1.08	6	5.12	1.12	6	0.03b	0.0903	0.818	0.485
slow	5.20583	0.605032	6	4.94333	0.701275	6	5.19583	0.961621	6	0.607	6.27	0.942306	6	5.73083	1.14326	6	4.96083	1.07502	6	0.069	0.132	0.18	0.589
hybrid	5.61667	0.663953	3	4.375	1.94454	2	5.4	0.43589	3	0.368			0	5.83667	1.2344	3	5.28875	1.17938	4	.109a		0.8	1
Fibertype p-value	0.717			1000			0.368				0.917a			0.097			0.174
LCFR
fast	1.37333	0.206898	6	1.38667	0.402103	6	1.25667	0.197956	6	0.438	1.91167	0.5367	6	1.335	0.41328	6	1.36833	0.487285	6	0.011g	0.065	0.485	0.589
slow	1.44333	0.273764	6	1.2625	0.284882	6	1.37917	0.442079	6	0.311	1.94167	0.425284	6	1.61417	0.554386	6	1.30917	0.467712	6	0.016h	0.065	0.132	0.818
hybrid	1.365	0.40832	3	1.13	0.59397	2	1.49333	0.20502	3	0.368			0	1.53667	0.5058	3	1.40875	0.586094	4	0.593a		0.8	1
Fibertype p-value	0.717			0.607			0.264				.917a			0.097			0.472
CFD
fast	300.137	66.1917	6	287.668	47.0804	6	274.884	60.8014	6	0.864	318.635	78.8637	6	305.152	60.5753	6	275.863	57.1669	6	0.607	0.818	0.31	0.699
slow	349.96	83.6965	6	333.252	65.9844	6	321.088	63.8025	6	0.864	349.162	85.4435	6	329.951	64.8159	6	308.752	71.1359	6	0.311	1	0.589	0.937
hybrid	358.05	68.5263	3	272.9	5.65685	2	334.545	83.1251	3	0.368			0	291.225	101.099	3	268.2	63.233	4	1.000ak		0.8	0.229
Fibertype p-value	0.097			0.607			.05i				0.028aj			0.264			0.368
SDH
fast	0.117981	0.0057714	6	0.122797	0.016351	6	0.114285	0.0108148	6	0.513	0.136549	0.052531	6	0.107488	0.0109491	6	0.112108	0.0175395	6	0.115	0.818	0.24	1
slow	0.154923	0.0149884	6	0.143866	0.0184999	6	0.139099	0.0131064	6	0.030f	0.160056	0.0483548	6	0.135661	0.0115813	6	0.147053	0.0265004	6	0.223	0.4885	0.485	0.818
hybrid	0.145667	0.0291271	3	0.148083	0.04113	2	0.135229	0.013523	3	0.368			0	0.122467	0.00735839	3	0.121585	0.015992	4	1.000a		1	0.4
Fibertype p-value	0.105			0.223			0.097				0.028aj			.05d			.018e
VO2max Fiber
fast	222.103	79.6516	6	239.285	98.7164	6	208.08	48.2206	6	0.846	376.108	294.092	6	188.811	49.6092	6	221.541	99.0156	6	0.135	0.132	0.699	1
slow	255.444	70.6745	6	232.268	108.354	6	240.251	113.244	6	0.311	418.624	343.742	6	277.98	86.9066	6	231.019	88.4155	6	0.311	0.31	0.394	0.818
hybrid	229.901	61.5932	4	322.46	249.813	3	232.715	74.8913	2	0.368										0.593a		1	1
Fibertype p-value	0.779			0.223			0.717				0.173aj			0.97			.018c
a	Wilcoxon test if one value is missing and Friedman cannot be performed
b	pre > recovery	p=0.028
c	fast < hybrid	p=0.018
d	fast < slow	p=0.043
e	fast < slow	p=0.014
f	pre>recovery	p=0.028
g	pre > post	p=0.028
g	pre > recovery	p=0.028
h	pre > recovery	p=0.012
i	fast < slow	p=0.043
j	fast vs slow
k	post vs recovery
